# Supplementary material
Source: Springer Nature journal article supplement (https://www.springermedizin.de/resource/supplementary/12967_2013_1688_MOESM14_ESM.pdf/9574660)

**A**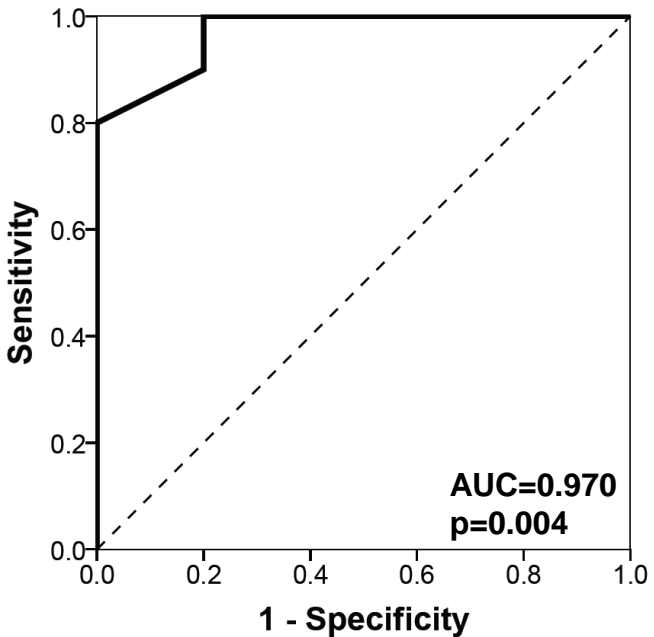**B**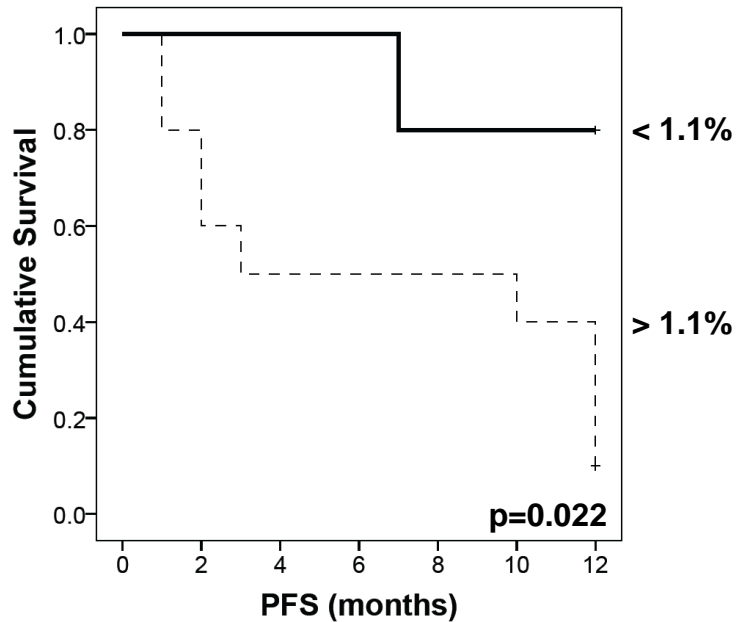

Supplement: MOESM14 [file 9574660]
